# Supplementary material for: Treatment of Multi-Walled Carbon Nanotubes with Dichromic Acid: Oxidation and Appearance of Intercalation
Source: MDPI journal article supplement (doi:10.3390/membranes13080729), 2023-08-12
Supplement: s1 [file s1]

# Treatment of Multi-Walled Carbon Nanotubes with Dichromic Acid: Oxidation and Appearance of Intercalation

Valeriy Golovakhin <sup>1</sup>, Ekaterina Yu. Kim <sup>1</sup>, Oksana N. Novgorodtseva <sup>1,2</sup>, Evgenii A. Maksimovskii <sup>3</sup>, Arina Ukhina <sup>2</sup>, Arcady V. Ishchenko <sup>4</sup>, and Alexander G. Bannov <sup>1,\*</sup>

<sup>1</sup> Department of Chemistry and Chemical Engineering, Novosibirsk State Technical University, 630073 Novosibirsk, Russia; golovaxin-valera@mail.ru (V.G.); katerina\_kim95@mail.ru (E.Y.K.); o.novgorodceva@corp.nstu.ru (O.N.N.)

<sup>2</sup> Institute of Solid State Chemistry and Mechanochemistry, Siberian Branch of Russian Academy of Sciences, 630092 Novosibirsk, Russia; auhina181@gmail.com

<sup>3</sup> Institute of Inorganic Chemistry, Siberian Branch, Russian Academy of Sciences, 630090 Novosibirsk, Russia; eugene@niic.nsc.ru

<sup>4</sup> Borekov Institute of Catalysis, Siberian Branch of Russian Academy of Sciences, 630090 Novosibirsk, Russia; arcady.ishchenko@gmail.com

\* Correspondence: bannov.alexander@gmail.com

TEM images of treated MWCNTs are presented below.

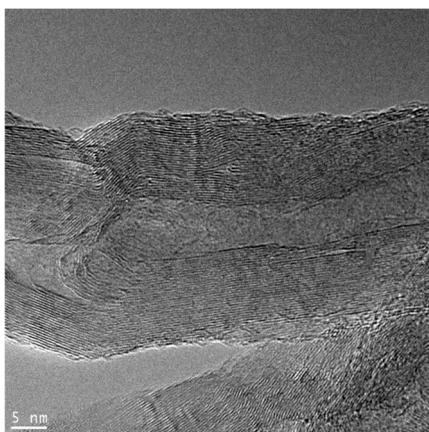

(a)

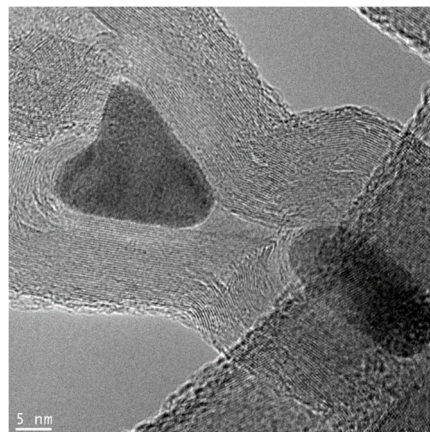

(b)

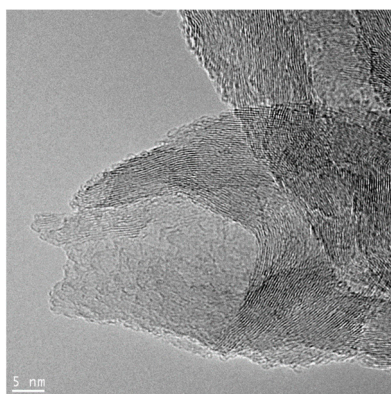

(c)

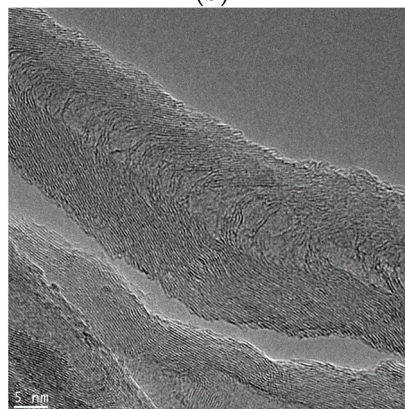

(d)

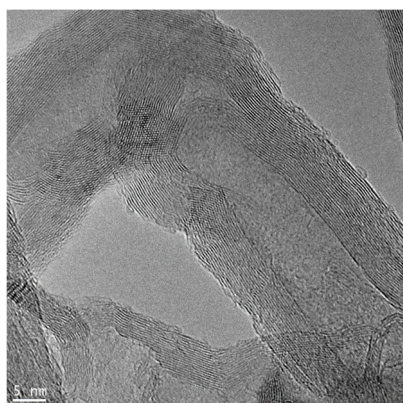

(e)

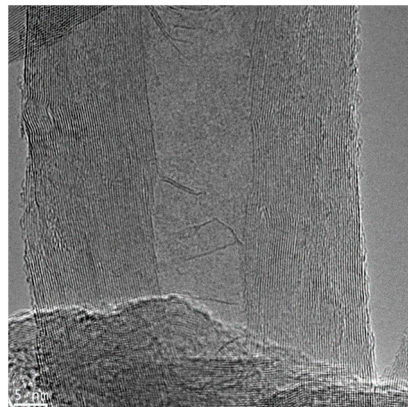

(f)

**Figure S1.** TEM images of treated samples of MWNTs: (a) MWNT-1020\_1M; (c) MWNT-1020\_3M; (e) MWNT-1020\_6M; (b) MWNT-4060\_1M; (d) MWNT-4060\_3M; (f) MWNT-4060\_6M.

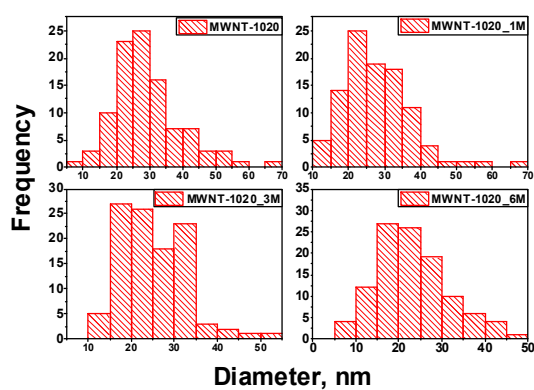

(a)

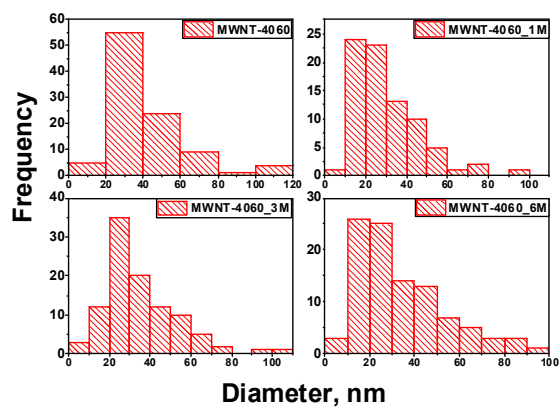

(b)

**Figure S2.** Distribution of diameters of CNFs formed during the treatment: (a) MWNT-1020 samples; (b) MWNT-4060 samples.

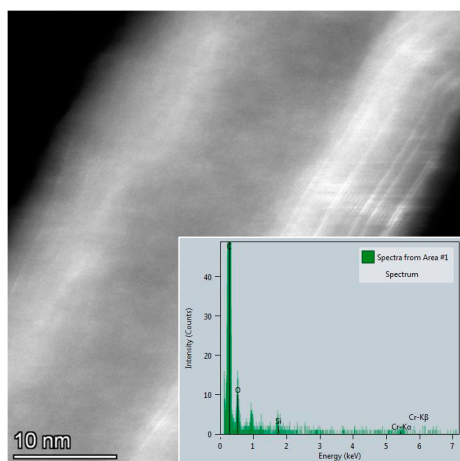

(a)

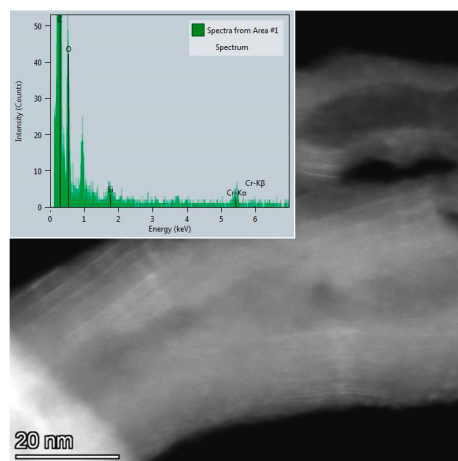

(b)

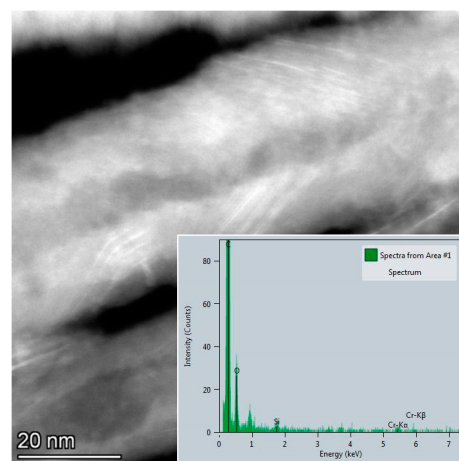

(c)

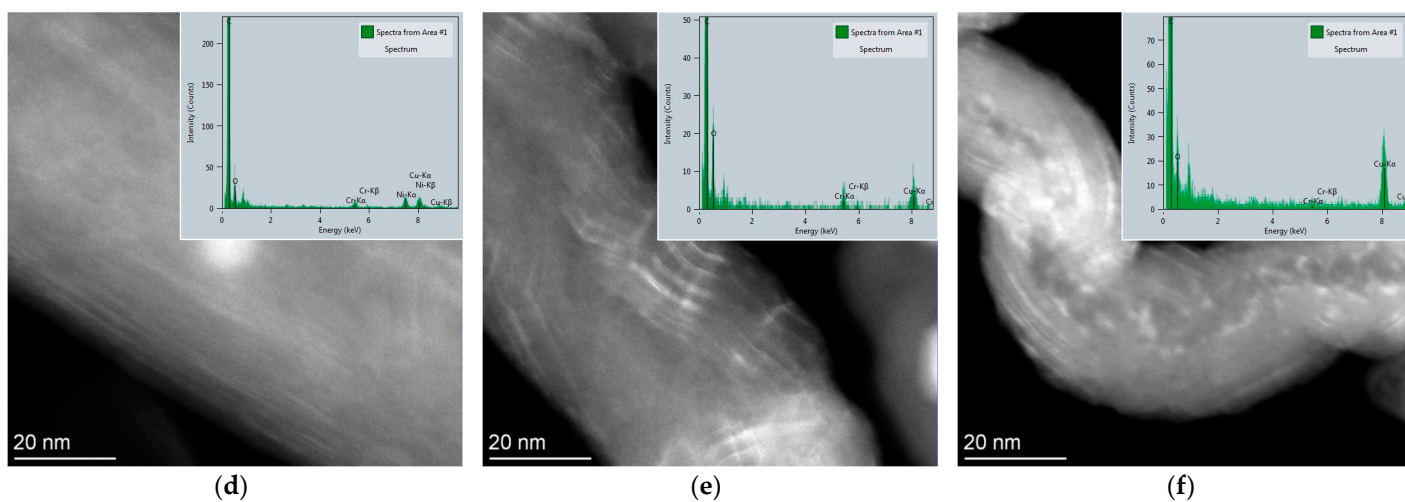

**Figure S3.** (a-f) HAADF-STEM micrographs of MWNT-4060\_3M sample accompanied with EDX spectra.

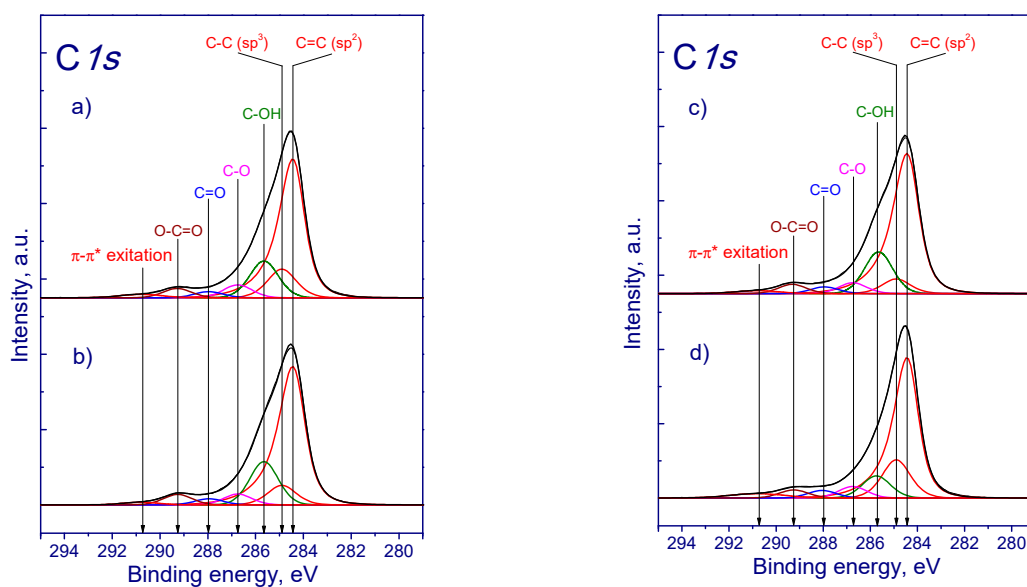

**Figure S4.** C1s X-ray photoelectron spectra of treated samples: (a) MWNT-4060\_1M; (b) MWNT-1020\_1M; (c) MWNT-4060\_3M; (d) MWNT-1020\_3M.

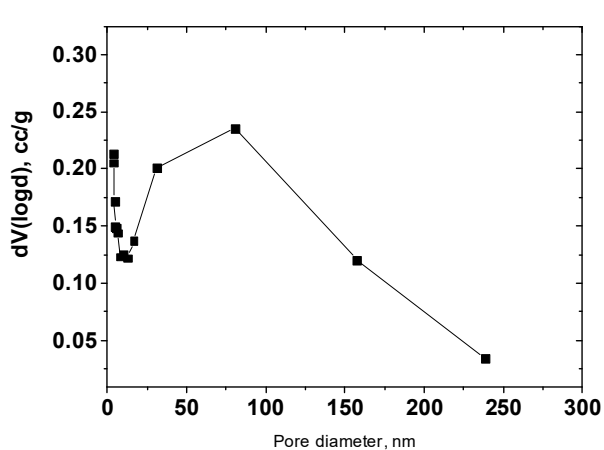

(a)

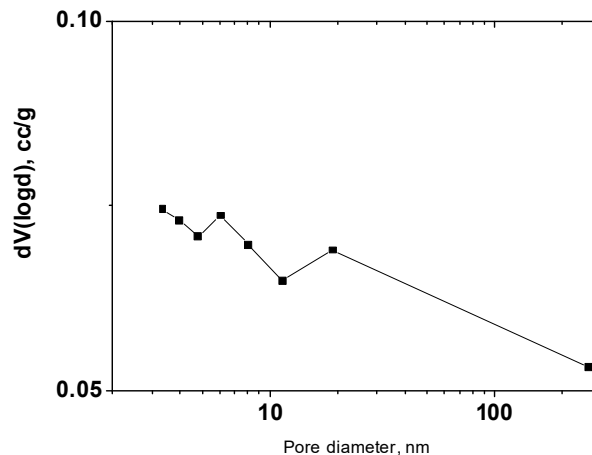

(b)

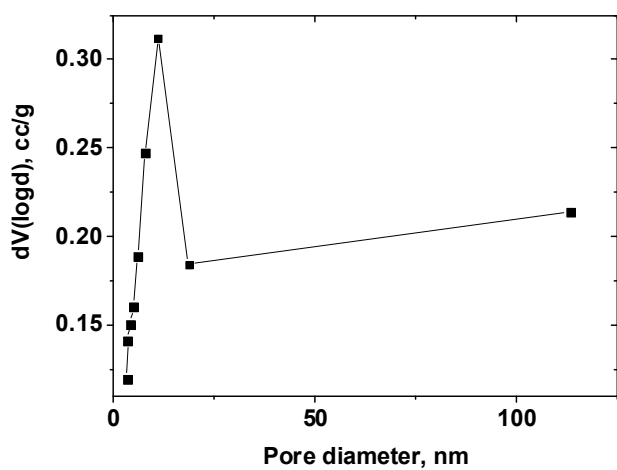

(c)

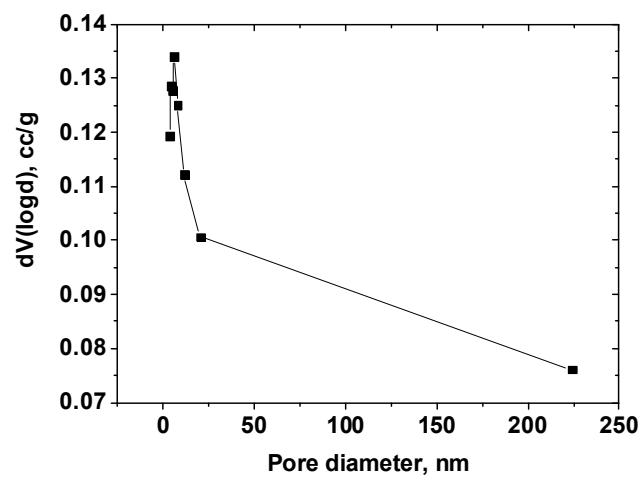

(d)

**Figure S5.** Pore size distribution of MWCNT samples with high specific capacitance: (a) WNT-1020; (d) MWNT-4060 initial samples; (c) MWNT-1020\_6M; (d) MWNT-4060\_3M chemically treated samples.
